# Supplementary material for: CRISPRs for Optimal Targeting: Delivery of CRISPR Components as DNA, RNA, and Protein into Cultured Cells and Single-Cell Embryos
Source: PubMed Central journal article supplement — Hum Gene Ther. 2016 Apr 19;27(6):464–75. doi: 10.1089/hum.2016.009 (PMC4931306; doi:10.1089/hum.2016.009), 2016-04-19
Supplement: Supp_Data.pdf [file Supp_Data.pdf]

**Supplemental Information for “CRISPRs for optimal targeting: Delivery of CRISPR components as DNA, RNA and protein into cultured cells and single-cell embryos”**

**Table S1** sgRNA and primer sequences

| Target Name        | Target site sequence                       | PCR forward primer      | PCR reverse primer        |
|--------------------|--------------------------------------------|-------------------------|---------------------------|
| ApoE #1            | GGCTCTGTGGCCCTGCTTGG                       | CACCCGGGGTCTGAGATAGAGAT | TTCCACCATGTTGGGCTCCG      |
| ApoE #3            | TCCCATTGCTGACAGGTATGGG                     | CACCCGGGGTCTGAGATAGAGAT | TTCCACCATGTTGGGCTCCG      |
| ApoE #7            | GGGATGATCATTGATTCCTCAGG                    | GTGGCTCCAAGATGGAGGA     | GGCCATGGAATGTGTGCTATGTC   |
| ApoE C2            | CGCAACATCCATGACCACCAGG                     | GTGGCTCCAAGATGGAGGA     | GGCCATGGAATGTGTGCTATGTC   |
| mRosa26            | CGCCCTCTCTAGAAAGACTGG                      | AAGGAGCTGCAGTGGAGTA     | CAAAACCCAAAATCTGTGGG      |
| rRosa26            | ACTCCAGTTGCAGATCACGAGGG                    | GGCGGATCACAAGCAATAAT    | CAGTGGAGTAGCCGGAGAAA      |
| rRosa26 (in vitro) | ACTCCAGTTGCAGATCACGAGGG                    | GGTGGCATGTCTTCAACTTA    | AAGGGAGCTGCAGTGGAGTAG     |
| mPtag1             | CACAGCTGTGCTGCTGCCATGG                     | ACAGCTCTCCAAACATGGAC    | GTCTCTCCATAAAACAGTGG      |
| mFlar1             | TGGGGTATGCACAGCTCAGTGG                     | AGGAAAGATTGCAGACCCTT    | AACAGAAAAGGATCTCTTAGTGG   |
| ApoE OT1-1         | GTCACGTGAGCCCTGCTGAAG                      | CTAACAAAAGTCTGCCAGGGC   | TCCCTTTCTGAGACGTTCCG      |
| ApoE OT1-2         | GGGTCTGGGAGCCCTGCTGAGG                     | GTTGTGGAAATGGGCATGAG    | TATCAGAGGGACCAACAGGC      |
| ApoE OT1-3         | AGCCCTGTGGCCCTGCTGTGGG                     | GGACCTTATAGCTGCCCTGTG   | GAAACCATGGGACAAATGGTATAGG |
| ApoE OT1-4         | GGCCCTGAAAGCCCTGCTGTGAG                    | GAGGAGTTGTGTTGGGGTCT    | AACTGAACCCGGCCCTTTACC     |
| ApoE OT1-5         | TGCTCTGTGTTCCCTGCTGTGAG                    | GGGTTCTATCCACAGTCCAC    | CAAGGCCCCACGTCGCTAC       |
| ApoE OT1-6         | GGGTCAGTGAGCCCTGCTGTGAG                    | TCTCTGCTCCAGGCAAGC      | ACAGGATTTGGTGGTGGTCT      |
| ApoE OT1-7         | GACCCGTGGGGCCCTGCTGTGAG                    | ACCTGATTTCAGGAAGGCTTGA  | TTGTGTGCCCGATGTTCCAG      |
| ApoE OT7-1         | GTGGTGGTCAATTGATTCACAGG                    | GGGTCGGTGACATCTCCATT    | TAAGACATTCGAGCCTGGAGC     |
| ApoE OT7-2         | GTGTGATCATTGATTCACAGG                      | GTCAAAGCACAATCTCCCC     | GGGTTTGTACGGCAGTCTT       |
| ApoE OT7-3         | CAAATGAGCATTGATTCACAGG                     | TCTGGAACCTTCTTAGGGGT    | ACGTGCCCTTCTAGTTTGTGC     |
| ApoE OT7-4         | TGCTTGTTCATTGATTCACAGG                     | ACACATGGGGCTTAGCTCTTT   | CCAAGGAGTGAACAGTAGCA      |
| ApoE OT7-5         | CGAATCAGCATTGATTCACAGG                     | GTCGGACATCTGACACGAGTT   | CCCTGTGTGGAGTTCCTAGT      |
| ApoE OT7-6         | TGGCTGATGTTGATTCACAGG                      | AGGGTGAGACAGCTTACAGTTT  | ATCAAGTCAGTGAAGTTGCTTTT   |
| ApoE OT7-7         | CGGAGGAACATTGATTCACAGG                     | ATGTACTGGTCTCGTACC      | CAATTGGAGTCCAGCCACT       |
| ApoE OT7-8         | GGGATGAAGATTCAATTCCTCAG                    | GGGCCCAGGAATGTTCTTTTG   | CTCTCAGTAGCAGACAGATGCT    |
| mRosa26 (ZFNs)     | TGCAACTCCAGTCTTCTAGAAGATGGGGGGGAGTC        | AAGGGAGCTGCAGTGGAGTA    | CAAAACCCAAAATCTGTGGG      |
| rRosa26 (ZFNs)     | TCCCGCCTATCTTCCAGAAAGACTCCAGTTGCAGATCACGAG | GGCGGATCACAAGCAATAAT    | CAGTGGAGTAGCCGGAGAAA      |

For each sgRNA target site, PAM sequence is in red. For the ZFN target sites, the cleavage sites are in red.

**Table S2** sgRNAs purified by ethanol precipitation are overestimated by Nanodrop measurement.

| sgRNA prep | Concentration by Nanodrop (ng/ $\mu$ l) |                     | Concentration by Qubit (ng/ $\mu$ l) | Fold of overestimation by Nanodrop |
|------------|-----------------------------------------|---------------------|--------------------------------------|------------------------------------|
|            | Original <sup>a</sup>                   | Repeat <sup>b</sup> |                                      |                                    |
| 1          | 1186                                    | 1181                | 114                                  | 10.36                              |
| 2          | 941                                     | 1009                | 132                                  | 7.64                               |
| 3          | 1293                                    | 1292                | 277                                  | 4.66                               |
| 4          | 3000                                    | 4433                | 1240                                 | 3.58                               |
| 5          | 2017                                    | 2116                | 314                                  | 6.74                               |
| 6          | 479                                     | 1916                | 250                                  | 7.66                               |
| 7          | 1250                                    | 1362                | 560                                  | 2.43                               |
| 8          | 1109                                    | 1345                | 457                                  | 2.94                               |
| 9          | 1695                                    | 1333                | 227                                  | 5.87                               |
| 10         | 1560                                    | 1639                | 1000                                 | 1.64                               |
| 11         | 2450                                    | 2412                | 1030                                 | 2.34                               |
| 12         | 1247                                    | 1149                | 186                                  | 6.18                               |
| 13         | 2120                                    | 2327                | 540                                  | 4.31                               |
| 14         | 4360                                    | 4047                | 1560                                 | 2.59                               |
| 15         | 4000                                    | 3794                | 1790                                 | 2.12                               |
| 16         | 2300                                    | 2150                | 1040                                 | 2.07                               |

Sixteen sgRNAs for various targets prepared at different times were initially measured on a Nanodrop. All of these samples were measured side by side using a Nanodrop and a Qubit.

<sup>a</sup>Concentrations measured using a Nanodrop at the time of each sgRNA preparation

<sup>b</sup>Concentrations measured using a Nanodrop at a later time, in parallel with Qubit measurement

**Table S3** Column purification of sgRNAs reduced concentration overestimation by a Nanodrop.

| sgRNA prep after column purification | Concentration by Nanodrop ( $\mu\text{g}/\mu\text{l}$ ) | Concentration by Qubit ( $\mu\text{g}/\mu\text{l}$ ) | Fold of overestimation by Nanodrop |
|--------------------------------------|---------------------------------------------------------|------------------------------------------------------|------------------------------------|
| 1                                    | 3.49                                                    | 1.91                                                 | 1.83                               |
| 2                                    | 2.54                                                    | 1.43                                                 | 1.77                               |
| 3                                    | 1.69                                                    | 1.37                                                 | 1.24                               |
| 4                                    | 3.04                                                    | 2.32                                                 | 1.31                               |
| 5                                    | 3.23                                                    | 2.66                                                 | 1.21                               |
| 6                                    | 2.57                                                    | 2.06                                                 | 1.25                               |
| 7                                    | 2.28                                                    | 1.05                                                 | 2.17                               |
| 8                                    | 2.39                                                    | 0.85                                                 | 2.81                               |
| 9                                    | 2.46                                                    | 1.43                                                 | 1.72                               |
| 10                                   | 2.03                                                    | 1.40                                                 | 1.45                               |
| 11                                   | 1.94                                                    | 1.36                                                 | 1.43                               |
| 12                                   | 2.27                                                    | 1.49                                                 | 1.52                               |

Twelve sgRNAs were purified using Megaclear columns after in vitro transcription and measured side-by-side using a Nanodrop and a Qubit.

**Table S4** mRNA preparations with comparable measurements by using a Nanodrop and Qubit.

| Cas9 mRNA Prep | Concentration by Nanodrop (ng/ $\mu$ l) |                     | Concentration by Qubit (ng/ $\mu$ l) | Fold of overestimation by Nanodrop |
|----------------|-----------------------------------------|---------------------|--------------------------------------|------------------------------------|
|                | Original <sup>a</sup>                   | Repeat <sup>b</sup> |                                      |                                    |
| 1              | 1330                                    | 1488                | 1320                                 | 1.13                               |
| 2              | 1890                                    | 2215                | 1990                                 | 1.11                               |
| 3              | 1800                                    | 1901                | 1650                                 | 1.15                               |
| 4              | 1700                                    | 2540                | 2100                                 | 1.21                               |

Various preparations of Cas9 mRNA, purified by using ammonium sulfate precipitation, were initially measured on a Nanodrop. All of these samples were measured side-by-side using a Nanodrop and a Qubit.

<sup>a</sup>Concentrations measured using a Nanodrop at the time of each mRNA preparation

<sup>b</sup>Concentrations measured using a Nanodrop at a later time, in parallel with Qubit measurement

**Table S5** Double stranded DNA with comparable measurements by using a Nanodrop and Qubit.

| DNA       | Concentration by Nanodrop (ng/ $\mu$ l) | Concentration by Qubit (ng/ $\mu$ l) |
|-----------|-----------------------------------------|--------------------------------------|
| PCR 1     | 50.1                                    | 53.1                                 |
| PCR 2     | 59.8                                    | 60.9                                 |
| PCR 3     | 123                                     | 136.3                                |
| Plasmid 1 | 40                                      | 32.4                                 |
| Plasmid 2 | 17.1                                    | 19.9                                 |



**Figure S2**

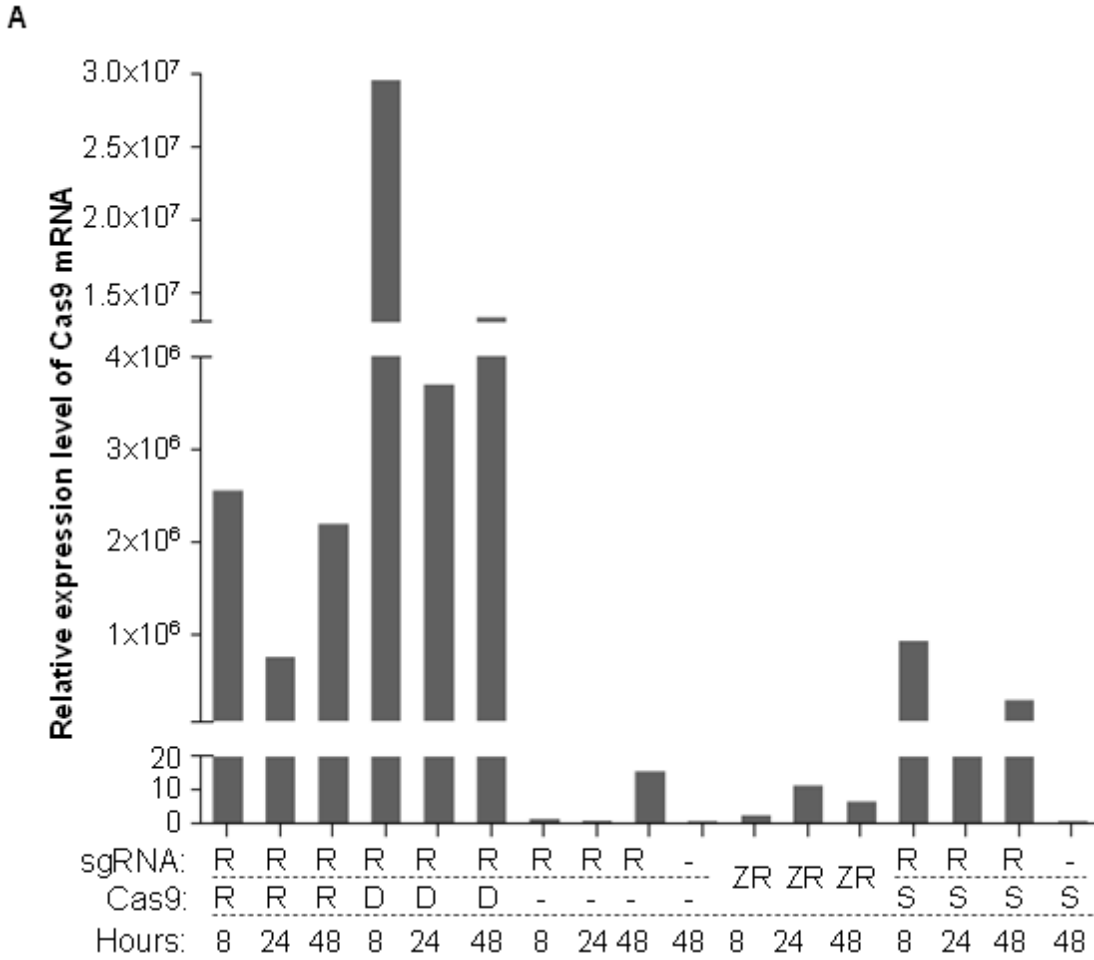

**Figure S2 A** Relative Cas9 mRNA levels detected by quantitative RT-PCR in samples of the right panel of Fig 1A. The rat C6 cells were transfected with sgRNA rRosa26 with Cas9 mRNA (R), Cas9 expression plasmid (D) or by itself (-). Samples from the C6 cell line stably expressing Cas9 are labeled as “S” for Cas9. Samples transfected with ZFNs against the Rosa26 locus are labeled as “ZR”. Cells were collected at three time points, 8, 24 and 48 hours post transfection, for qRT-PCR.

**Figure S2**

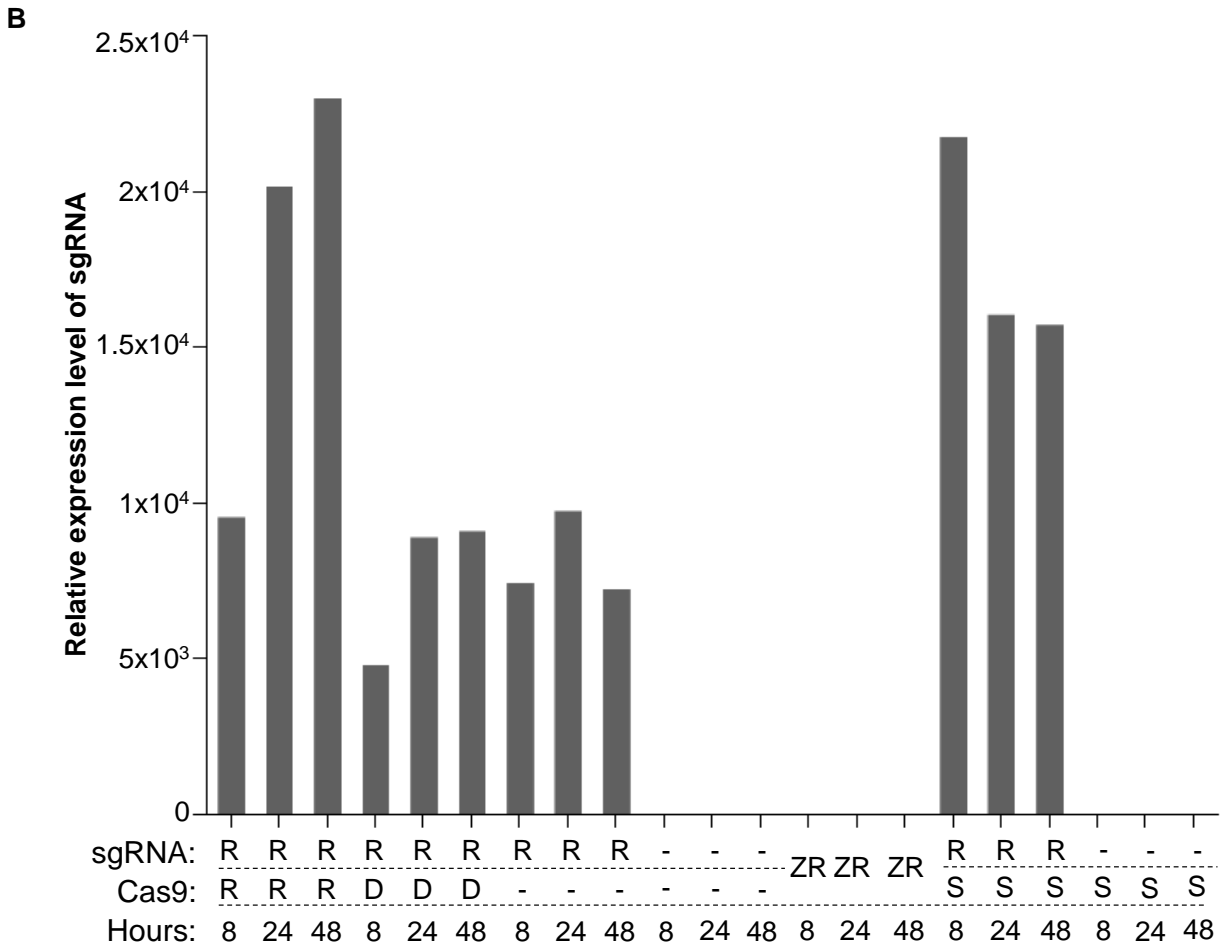

**Figure S2B** Relative sgRNA Rosa26 levels detected by qRT-PCR from the same samples in **A**.



**Figure S2**

**C**

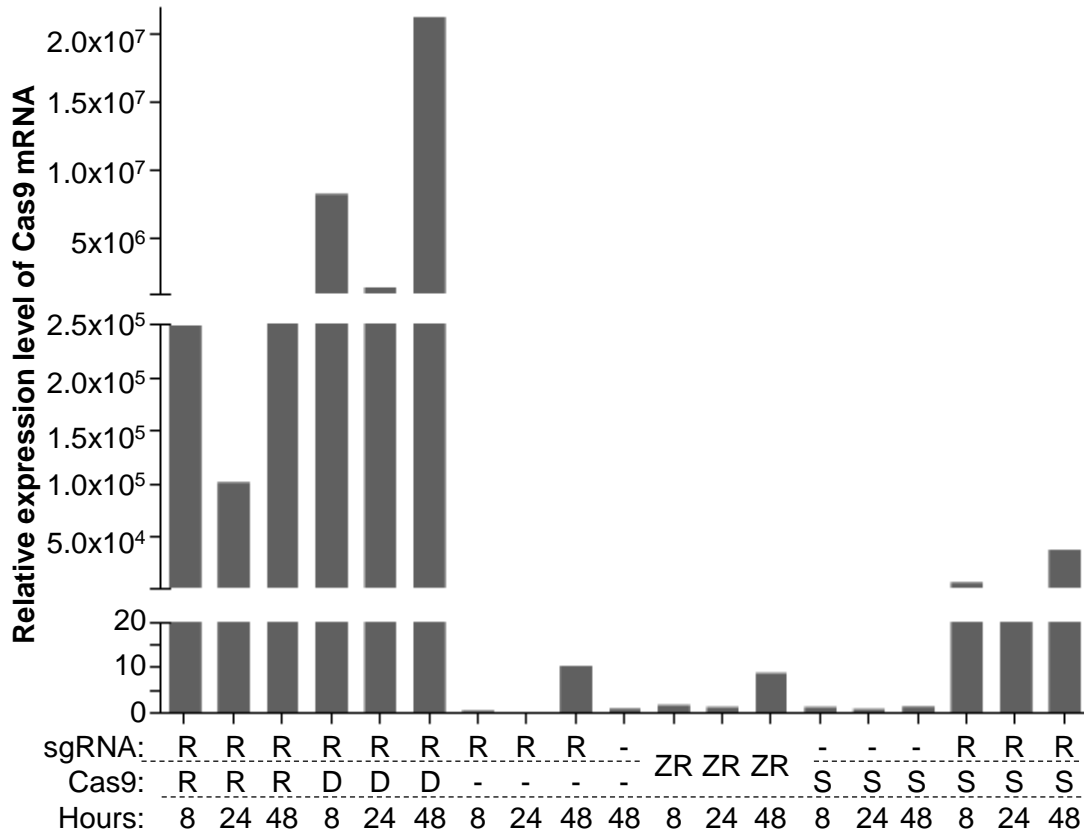

**Figure S2C** Relative Cas9 mRNA levels detected by quantitative RT-PCR in samples of the right panel of **Fig. 1B**. The mouse Neuro-2a cells were transfected with sgRNA mRosa26 with Cas9 mRNA (R), Cas9 expression plasmid (D) or by itself (-). Samples from the Neuro-2a cell line stably expressing Cas9 are labeled as “S” for Cas9. Samples transfected with ZFNs against the Rosa26 locus are labeled as “ZR”. Cells were collected at three time points, 8, 24 and 48 hours post transfection, for qRT-PCR.

Figure S2

D

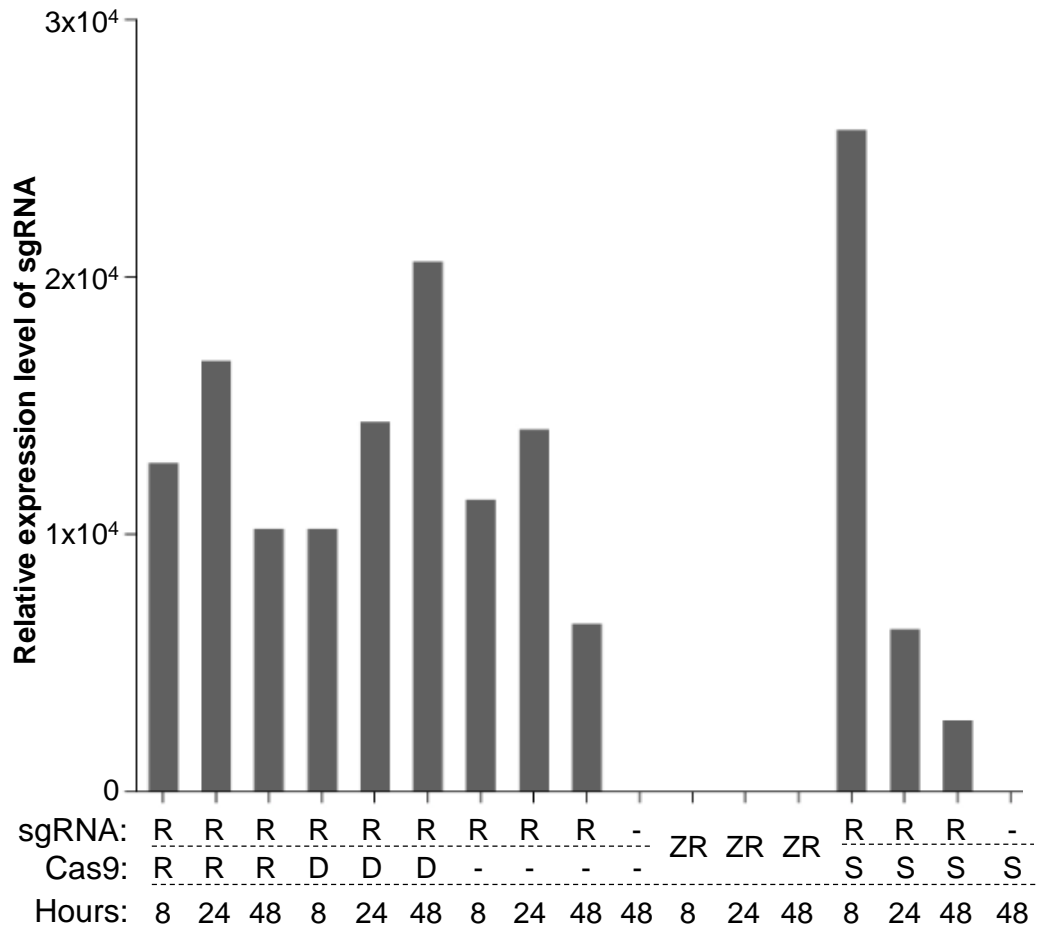

Figure S2D Relative sgRNA mRosa26 levels detected by qRT-PCR from the same samples in Fig. S2C.

**E**

|        |   |   |    |    |    |    |    |    |    |   |   |    |    |    |    |    |    |    |
|--------|---|---|----|----|----|----|----|----|----|---|---|----|----|----|----|----|----|----|
| sgRNA: | R | R | R  | R  | R  | R  | R  | R  | -  | R | R | R  | R  | R  | R  | R  | R  | -  |
| Cas9:  | R | R | R  | R  | R  | R  | R  | R  | -  | - | - | -  | -  | -  | -  | -  | -  | -  |
| Hours: | 3 | 6 | 24 | 30 | 48 | 54 | 72 | 96 | 96 | 3 | 6 | 24 | 30 | 48 | 54 | 72 | 96 | 96 |

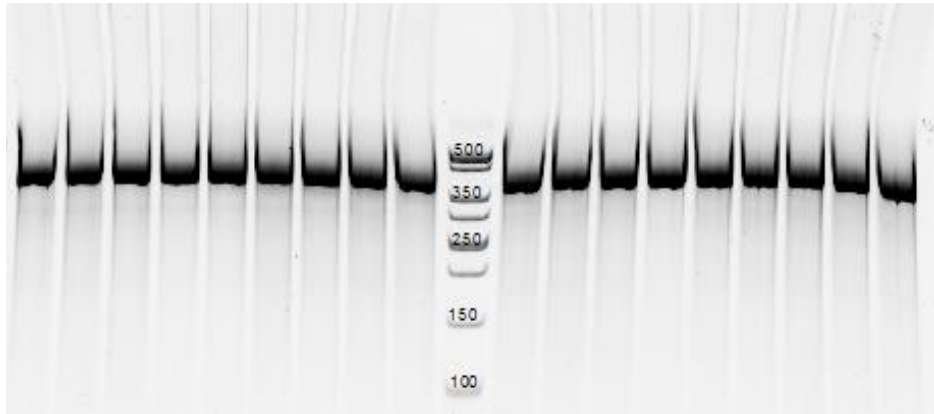

**F**

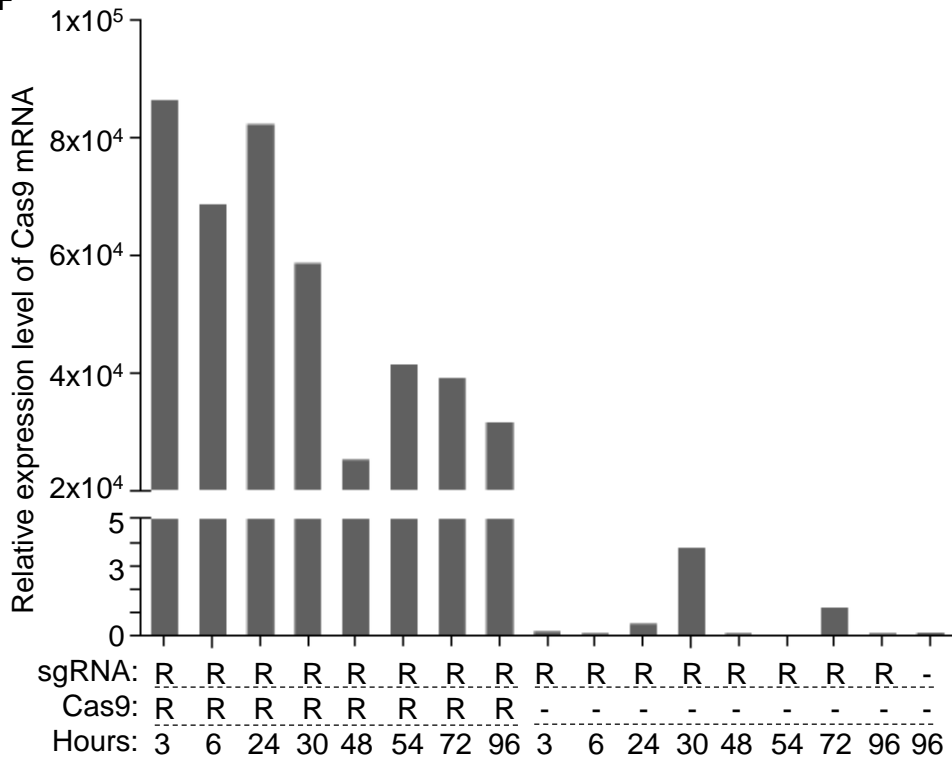

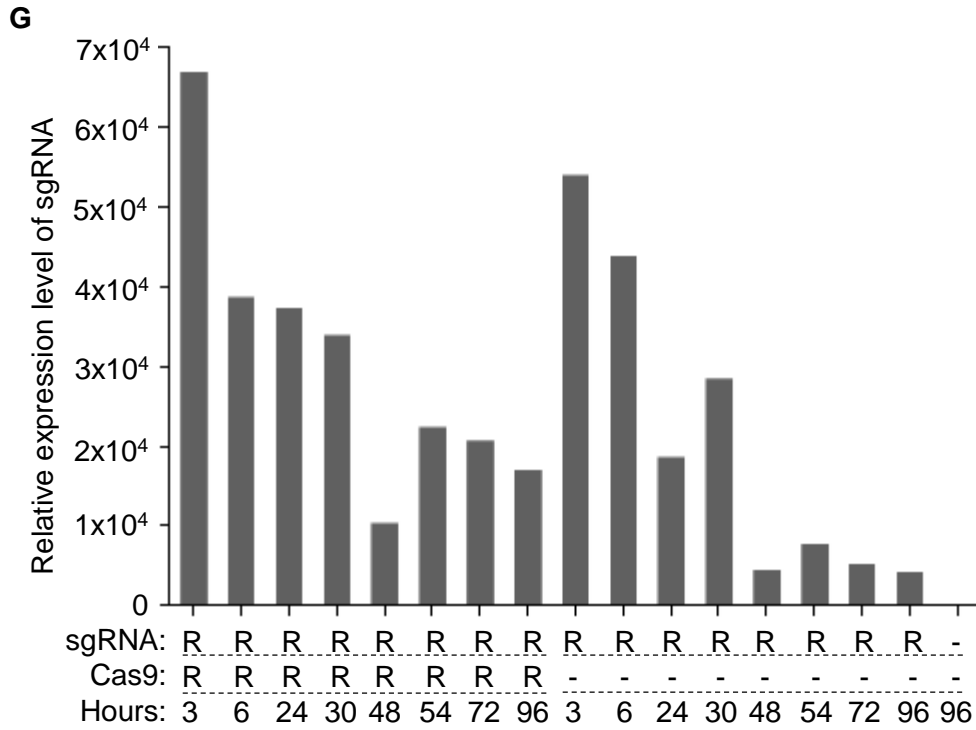

**Figure S2 E-G** A more detailed time course of the rat C6 cells transfected with the ApoE sgRNA #1 with and without Cas9 mRNA. No NHEJ signal was detectable in any of the samples (**E**). Relative Cas9 mRNA (**F**) and sgRNA (**G**) levels were detected by quantitative RT-PCR in each sample in **E**.

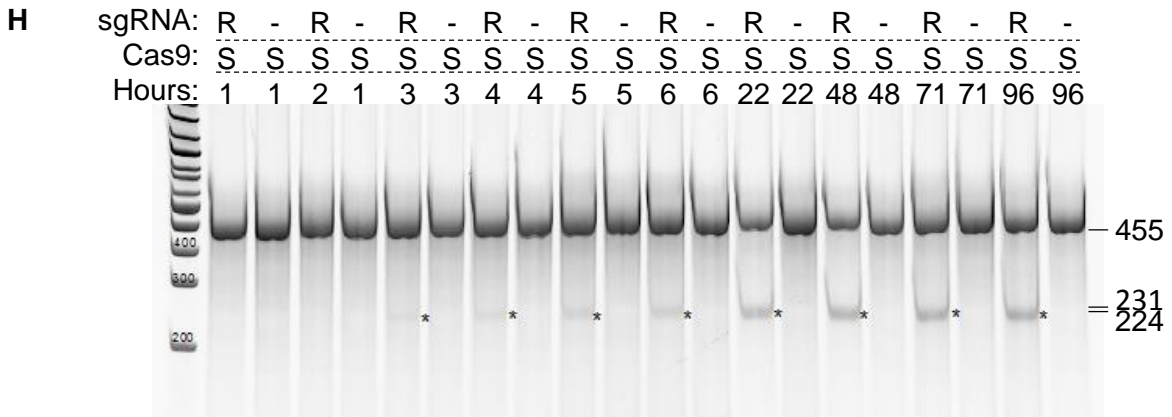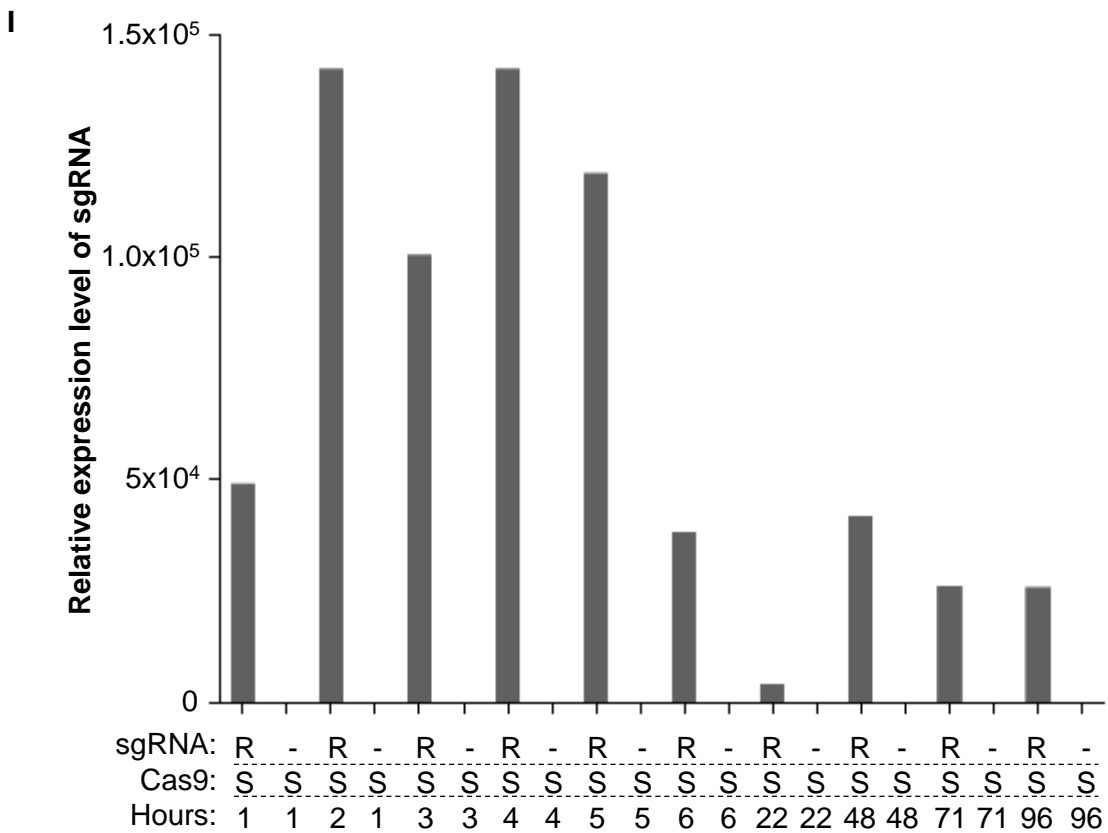

**Figure S2H-I** A more detailed time course of the rat C6 cells transfected with (R) and without (-) the ApoE sgRNA #1. Cleaved bands at 231 bp and 224 bp are indicative of NHEJ events in the transfected cells. Relative sgRNA levels (**I**) were detected by quantitative RT-PCR in each sample in **H**.

**Figure S2** Unbound sgRNAs were relatively stable after transfection. **A** Relative Cas9 mRNA levels detected by quantitative RT-PCR in samples of the right panel of Fig 1A. The rat C6 cells were transfected with sgRNA rRosa26 with Cas9 mRNA (R), Cas9 expression plasmid (D) or by itself (-). Samples from the C6 cell line stably expressing Cas9 are labeled as “S” for Cas9. Samples transfected with ZFNs against the Rosa26 locus are labeled as “ZR”. Cells were collected at three time points, 8, 24 and 48 hours post transfection, for qRT-PCR. **B** Relative sgRNA Rosa26 levels detected by qRT-PCR from the same samples in **A**. **C** Relative Cas9 mRNA levels detected by quantitative RT-PCR in samples of the right panel of **Fig. 1B**. The mouse Neuro-2a cells were transfected with sgRNA mRosa26 with Cas9 mRNA (R), Cas9 expression plasmid (D) or by itself (-). Samples from the Neuro-2a cell line stably expressing Cas9 are labeled as “S” for Cas9. Samples transfected with ZFNs against the Rosa26 locus are labeled as “ZR”. Cells were collected at three time points, 8, 24 and 48 hours post transfection, for qRT-PCR. **D** Relative sgRNA mRosa26 levels detected by qRT-PCR from the same samples in **C**. **E** A more detailed time course of the rat C6 cells transfected with the ApoE sgRNA #1 with and without Cas9 mRNA. No NHEJ signal was detectable in any of the samples. Relative Cas9 mRNA (**F**) and sgRNA (**G**) levels were detected by quantitative RT-PCR in each sample in **E**. **H** A more detailed time course of the rat C6 cells transfected with (R) and without (-) the ApoE sgRNA #1. Cleaved bands at 231 bp and 224 bp are indicative of NHEJ events in the transfected cells. Relative sgRNA levels (**I**) were detected by quantitative RT-PCR in each sample in **H**.

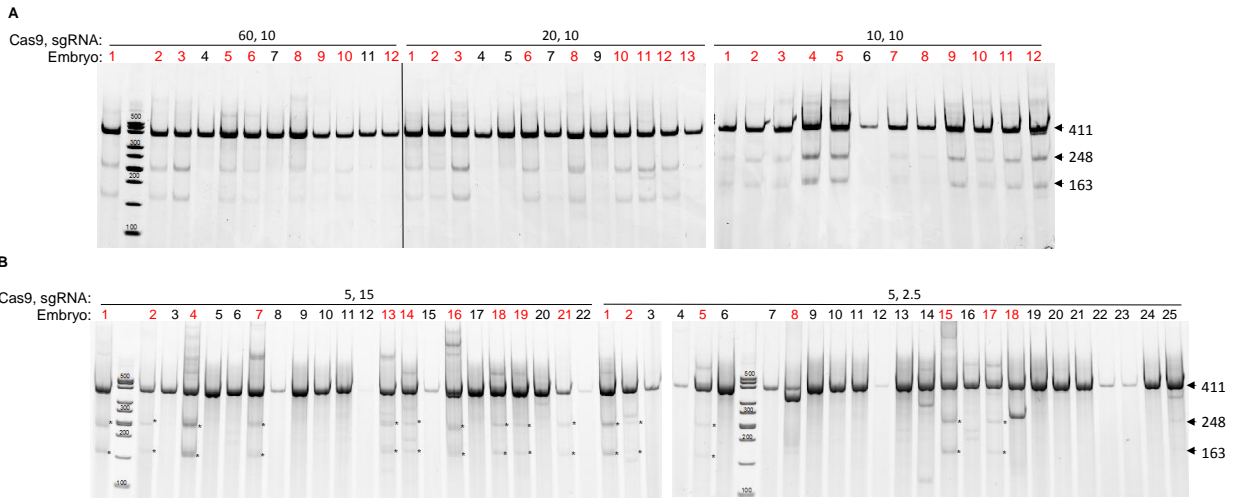

**Figure S3** Titration of Cas9 mRNA and sgRNA concentrations for microinjection into single-cell mouse embryos: Different combinations of Cas9 mRNA and sgRNA concentrations were injected, and injected embryos were incubated in vitro to blastocysts and analyzed for NHEJ events using Cel-I assay. Concentrations are labeled above each group. **A** “60, 10”, “20, 10”, and “10, 10” refer to 60 ng/μl, 20 ng/μl and 10 ng/μl of Cas9 mRNA and 10 ng/μl sgRNA, respectively. **B** “5, 15” and “5, 2.5” refer to 5 ng/μl Cas9 mRNA coinjected with 15 ng/μl or 2.5 ng/μl sgRNA. Embryos modified by CRISPR are marked in red.

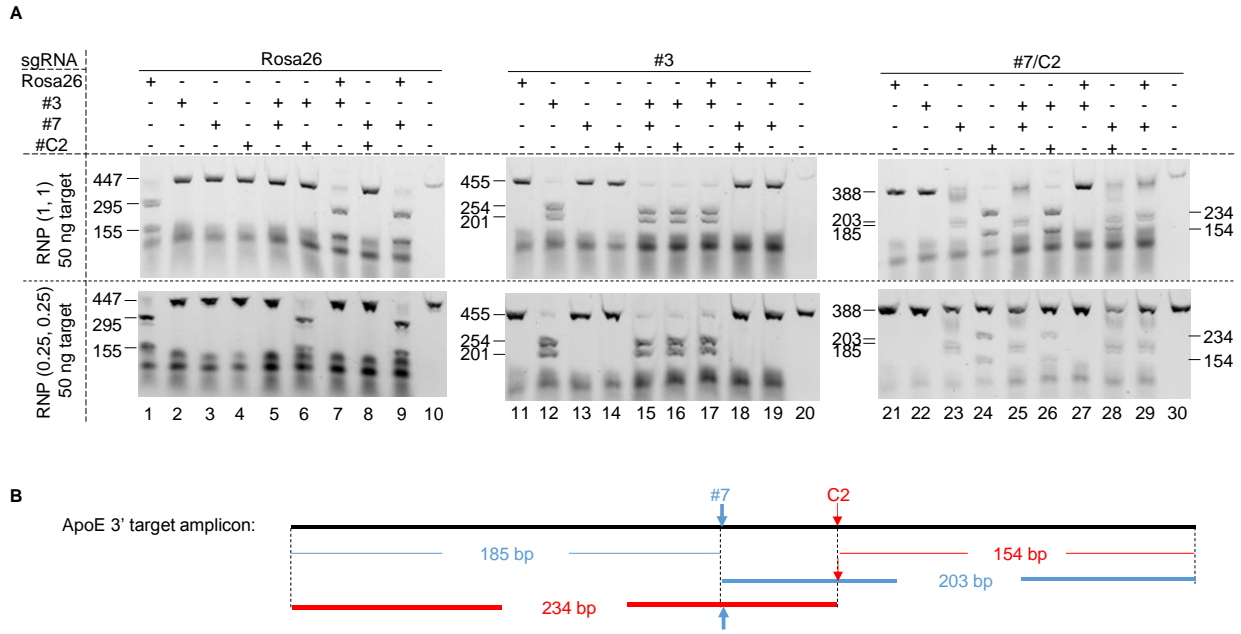

**Figure S4.** *In vitro* competition assay with two different amounts of RNP complex. **A** In addition to being shown in Fig. 5, where the *in vitro* competition assay was carried out with RNP (1, 1), referring to equivalent of 1  $\mu$ g of Cas9 protein and 1  $\mu$ g of each sgRNA (top panels), we also lowered the protein/sgRNA amount to RNP (0.25, 0.25), referring to 0.25  $\mu$ g of Cas9 protein and 0.25  $\mu$ g of each sgRNA (bottom panels). Target sites and sgRNA(s) added in each reaction are labeled on top of each lane. Lanes 6 and 7 in the bottom left panel were switched at loading. In the right hand two panels, band sizes on the left are expected for cleavage by sgRNA #7, and on the right, by C2. **B** Schematic of sgRNAs #7 and C2 cleavage sites proportional to sequences in base pairs. The exact cleavage sites are marked by arrows and resulting cleavage products from the PCR amplified target region are marked with their sizes in base pairs: #7 in blue, and C2 in red, respectively. Each of the two large cleavage products, marked in thicker lines, 234 bp from C2 and 203 bp from #7 can be cleaved by the other RNP again, demonstrated by a blue arrow on the 234 bp fragment, and red on 203 bp fragment, and result in 185 bp and 154 bp fragments, respectively.



**Figure S5**

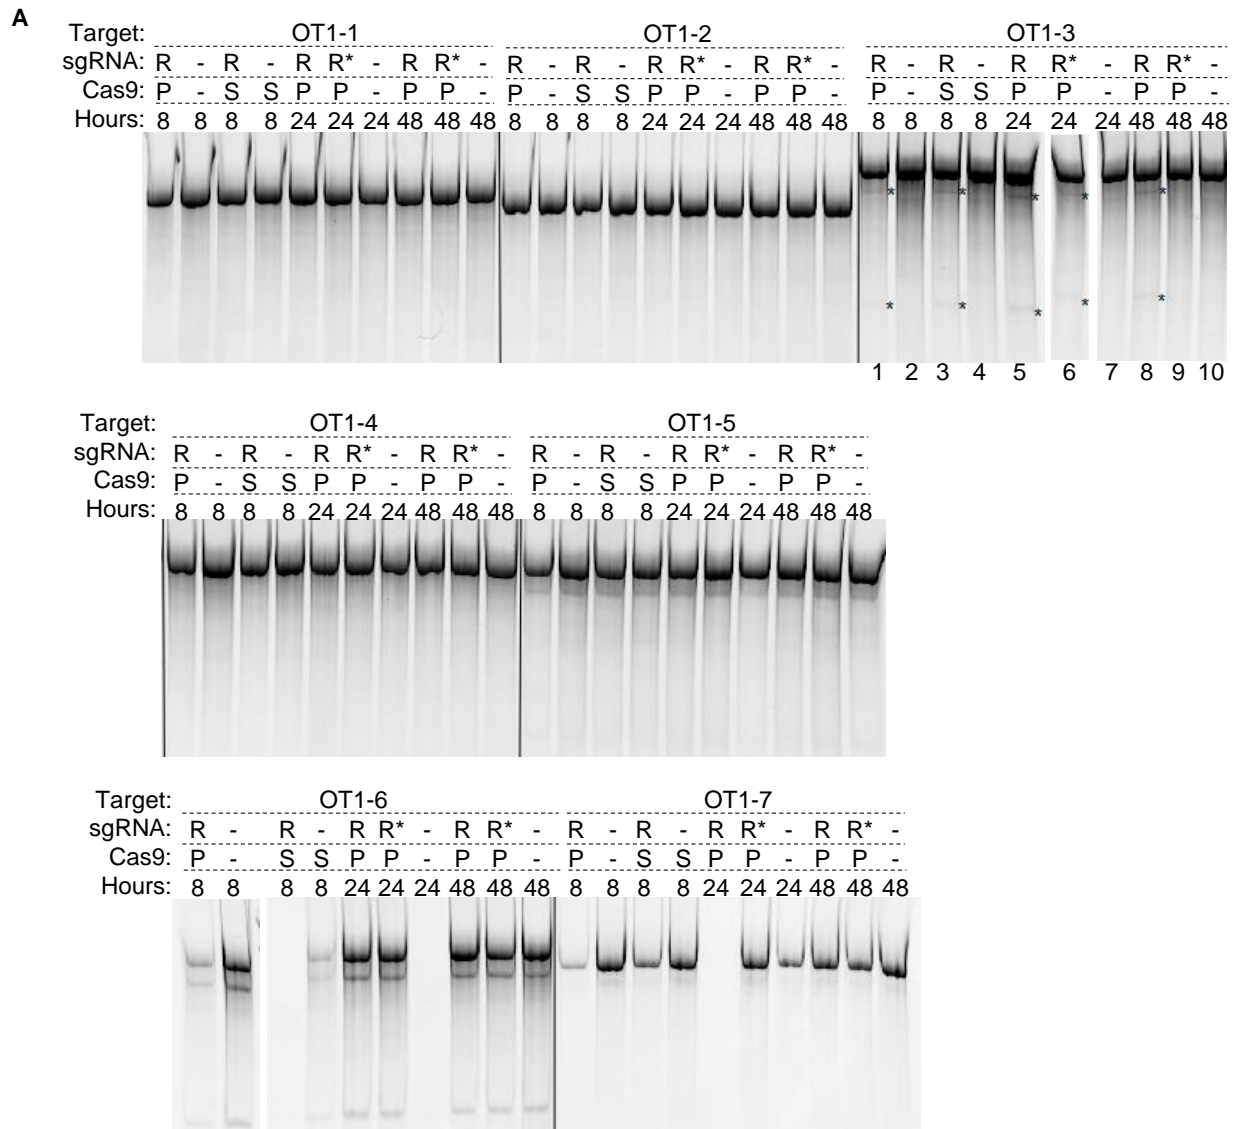

**Figure S5**

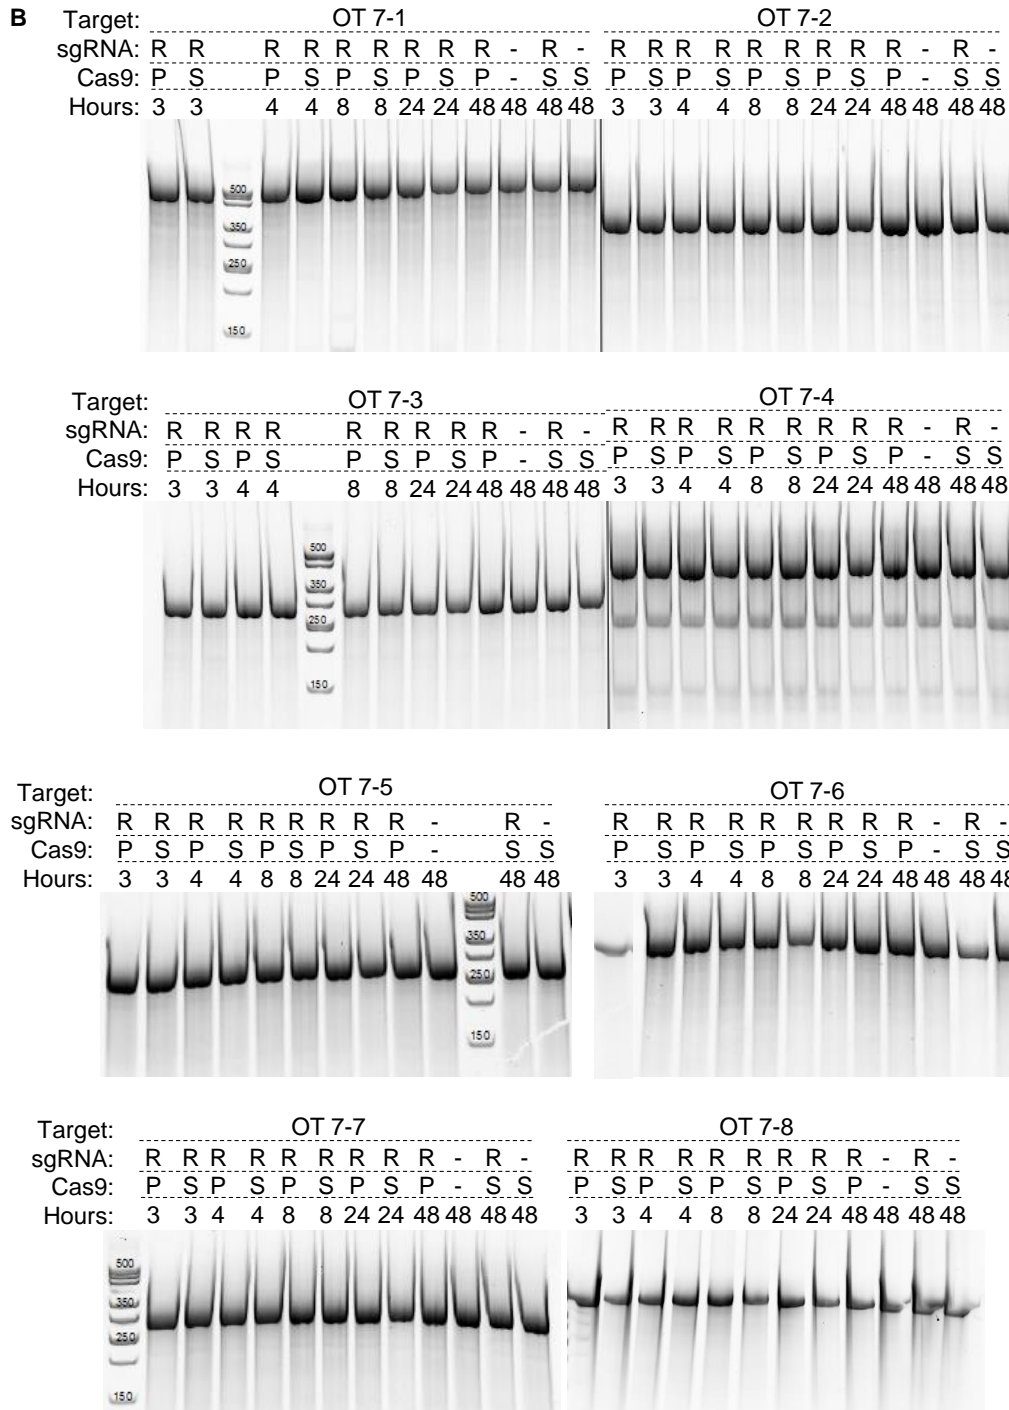

**Figure S5** Off targeting detection in rat C6 cells. Samples from Fig 3 were analyzed at the top predicted off target sites for sgRNA #1 (A) and sgRNA #7 (B) using Cel-I assay. Cleaved bands indicative of positive off target events at off target site 1-3 (OT1-3) are marked with asterisks. Cas9 protein (P), Cas9 mRNA (R) or Cas9 expression plasmid (D) were cotransfected with

either 12 ug (R) or 2 ug (R\*) of sgRNA into C6. Samples from Cas9 stable cell line transfections are marked as “S” for Cas9. Lanes for OT1-3 and OT1-6 were assembled from different gels due to loading. Cleaved bands in OT 1-6 and OT 7-4 resulted from SNPs.
